# Supplementary material for: Rrm3 Protects the Saccharomyces cerevisiae Genome From Instability at Nascent Sites of Retrotransposition
Source: Oxford University Press journal article supplement (doi:10.1534/genetics.109.104208), 2009-05-05
Supplement: 104208_si.pdf [file 104208_si.pdf]

# GENETICS

**Supporting Information**

<http://www.genetics.org/cgi/content/full/genetics.109.104208/DC1>

**Rrm3 Protects the *Saccharomyces cerevisiae* Genome  
From Instability at Nascent Sites of Retrotransposition**

**Radostina Stamenova, Patrick H. Maxwell, Alison E. Kenny and M. Joan Curcio**

Copyright © 2009 by the Genetics Society of America

DOI: 10.1534/genetics.109.104208

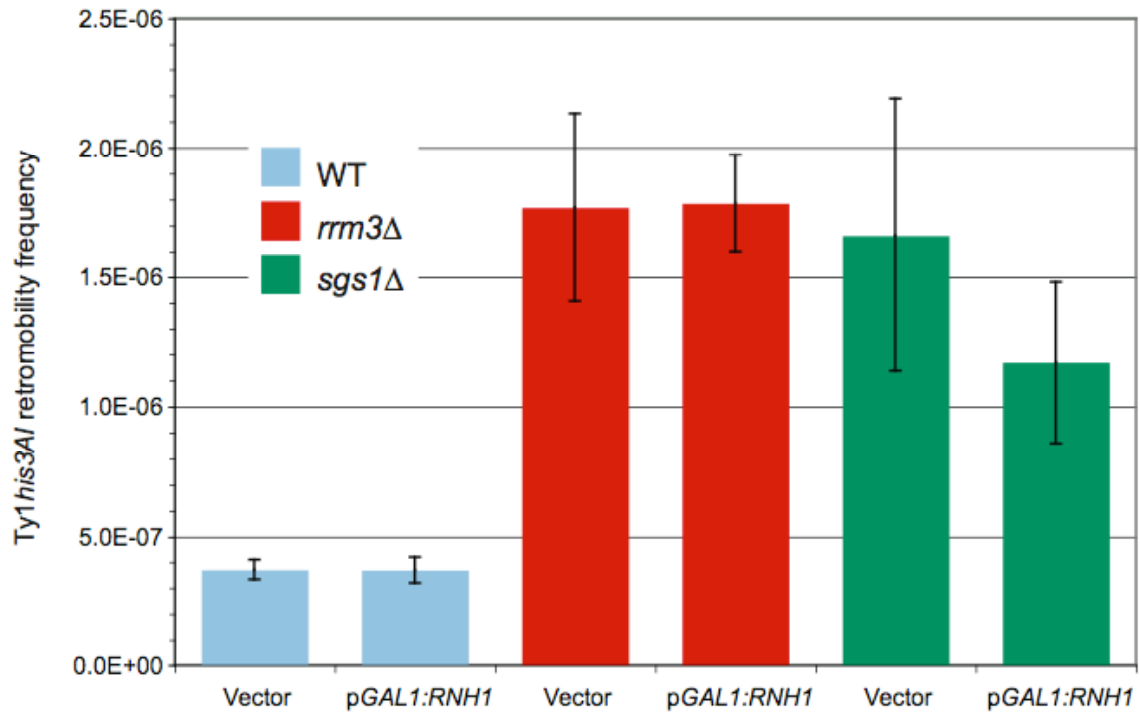

FIGURE S1.—Overexpression of RNase H does not effect the frequency of Ty1his3AI retromobility. Strains JC3212, JC3917 and JC4915 transformed with plasmid pRS416 or pGAL1:RNH1 were grown overnight in SC-Ura glucose broth at 30°. Cells were pelleted and resuspended in an equal volume of H<sub>2</sub>O. Cells were diluted 1:100 into 4 ml SC-Ura galactose broth, divided into 4 cultures and grown to saturation at 20°. An equal volume of YPD broth was added to each culture, and the cultures were incubated for 18 to 20 hr at 20°. Aliquots of each culture were plated on SC-Ura and SC-Ura-His glucose agar. Plates were incubated for three days at 30° and the colonies were counted. The retromobility frequency is the average of the number of His<sup>+</sup> Ura<sup>+</sup> colonies divided by the total number of Ura<sup>+</sup> colonies that retained the vector or pGAL1:RNH1 plasmid throughout incubation at 20°. The average of three experiments is presented. Error bars, standard error.

**TABLE S1****Sequences flanking the 3' end of Ty1*HIS3* retromobility events**A. Ty1*HIS3* recombination events in *rrm3Δ* mutant

| His <sup>+</sup> isolate | Chromosome | Coordinate | RNA pol III-transcribed gene within 825 bp | Other features of Ty1 <i>HIS3</i> junction                             |
|--------------------------|------------|------------|--------------------------------------------|------------------------------------------------------------------------|
| rrm3-26                  | Unknown    | Unknown    | Unknown                                    | At LTR- <i>TYA1</i> boundary of a Ty1 element, in the same orientation |
| rrm3-76                  |            |            |                                            |                                                                        |
| rrm3-87                  |            |            |                                            |                                                                        |
| rrm3-91                  |            |            |                                            |                                                                        |
| rrm3-105                 |            |            |                                            |                                                                        |
| rrm3-106                 |            |            |                                            |                                                                        |
| rrm3-128                 |            |            |                                            |                                                                        |
| rrm3-136                 |            |            |                                            |                                                                        |
| rrm3-139                 |            |            |                                            |                                                                        |
| rrm3-148                 |            |            |                                            |                                                                        |

B. Ty1*HIS3* integration events in *rrm3Δ* mutant

|         |      |        |                         |                                                                                                                                              |
|---------|------|--------|-------------------------|----------------------------------------------------------------------------------------------------------------------------------------------|
| rrm3-1  | VII  | 661455 | <i>tI(UGU)G1</i>        | 298 bp upstream of <i>tI(UGU)G</i> , same orientation                                                                                        |
| rrm3-2  | III  | 142880 | <i>SUF16</i>            | In <i>YCRCdelta7</i> ; 111 bp upstream of <i>SUF16</i> , same orientation                                                                    |
| rrm3-3  | X    | 538434 | <i>H SX1</i>            | 114 bp upstream of <i>H SX1</i> , same orientation                                                                                           |
| rrm3-4  | IV   | 645389 | <i>tQ(UUG)D2</i>        | 168 bp upstream of <i>tQ(UUG)D2</i> , same orientation                                                                                       |
| rrm3-5  | XIII | 589800 | —                       | 251 bp upstream of <i>MSS11</i> ORF; 293 bp downstream of <i>PAH1</i> ORF                                                                    |
| rrm3-6  | VII  | 287653 | <i>tW(CCA)G1</i>        | 192 bp upstream of <i>tW(CCA)G1</i> , same orientation                                                                                       |
| rrm3-7  | XII  | 489250 | <i>RDN5-3, -5 or -6</i> | In <i>YLR156W, -159W</i> or <i>-161W</i> (identical uncharacterized ORFs); 100 bp upstream of <i>RDN5-3, -5 or -6</i> , opposite orientation |
| rrm3-8  | XV   | 594514 | <i>SUF5</i>             | At 5' boundary of <i>YORWdelta12</i> , opposite orientation; 88 bp upstream of <i>SUF5</i> , same orientation                                |
| rrm3-9  | XVI  | 776388 | <i>tC(GCA)P2</i>        | In <i>YPRWdelta14</i> ; 554 bp upstream of <i>tC(GCA)P2</i> , opposite orientation                                                           |
| rrm3-10 | IV   | 645389 | <i>tQ(UUG)D2</i>        | 168 bp upstream of <i>tQ(UUG)D2</i> , same orientation                                                                                       |
| rrm3-13 | XI   | 379220 | <i>tV(AAC)K2</i>        | 103 bp upstream of <i>tV(AAC)K2</i> , same orientation                                                                                       |

|          |         |         |                  |                                                                                        |
|----------|---------|---------|------------------|----------------------------------------------------------------------------------------|
|          |         |         |                  | orientation                                                                            |
| rrm3-14  | XII     | 468334  | <i>RDN5-2</i>    | 480 bp upstream of <i>RDN5-2</i> , same orientation                                    |
| rrm3-15  | VII     | 779527  | <i>SUF4</i>      | 94 bp upstream of <i>SUF4</i> , opposite orientation                                   |
| rrm3-18  | II      | 9406    | <i>tL(UUA)BI</i> | In <i>YBLWdelta2</i> ; 177 bp upstream of <i>tL(UUA)BI</i> , same orientation          |
| rrm3-28  | XVI     | 560830  | <i>tF(GAA)PI</i> | 544 bp upstream of <i>tF(GAA)PI</i> , opposite orientation                             |
| rrm3-35  | XII     | 468450  | <i>RDN5-2</i>    | 364 bp upstream of <i>RDN5-2</i> , same orientation                                    |
| rrm3-38  | XV      | 673755  | —                | 1343 bp upstream of <i>SYCI</i> ORF; 598 bp downstream of <i>DCII</i> ORF              |
| rrm3-39  | VII     | 701357  | <i>tK(UUU)G2</i> | 305 bp upstream of <i>tK(UUU)G2</i> , opposite orientation                             |
| rrm3-73  | Unknown | Unknown | Unknown          | At +105 of Ty2 LTR, opposite orientation                                               |
| rrm3-88  | VII     | 701279  | <i>tK(UUU)G2</i> | In <i>YGRWdelta19</i> ; 227 bp upstream of <i>tK(UUU)G2</i> , opposite orientation     |
| rrm3-96  | XVI     | 859967  | <i>tG(GCC)P2</i> | 408 bp upstream of <i>tG(GCC)P2</i> , same orientation                                 |
| rrm3-97  | Unknown | Unknown | Unknown          | At +289 of Ty4 LTR, opposite orientation                                               |
| rrm3-98  | Unknown | Unknown | Unknown          | At +177 of Ty1 LTR, opposite orientation                                               |
| rrm3-99  | X       | 234028  | <i>tR(ACG)J</i>  | 21 bp downstream of <i>tR(ACG)J</i>                                                    |
| rrm3-101 | II      | 401157  | —                | 273 bp upstream of <i>SEC18</i> ORF; 90 bp downstream of <i>SPT7</i> ORF               |
| rrm3-102 | VII     | 931850  | <i>tG(GCC)G2</i> | In <i>YGRWdelta32</i> ; 824 bp upstream of <i>tG(GCC)G2</i> , same orientation         |
| rrm3-120 | VII     | 701235  | <i>tK(UUU)G2</i> | In <i>YGRWdelta19</i> ; 183 bp upstream of <i>tK(UUU)G2</i> , same orientation         |
| rrm3-127 | XIV     | 102518  | <i>tN(GUU)NI</i> | In 5' LTR of <i>YNLCTy1-1</i> ; 198 bp upstream of <i>tN(GUU)NI</i> , same orientation |
| rrm3-129 | XI      | 302193  | <i>tW(CCA)K</i>  | In <i>YKLCdelta5</i> ; 369 bp upstream of <i>tW(CCA)K</i> , same orientation           |
| rrm3-130 | XIV     | 570064  | <i>tI(AAU)NI</i> | 123 bp upstream of <i>tI(AAU)NI</i> , same orientation                                 |
| rrm3-146 | XVI     | 810499  | <i>tN(GUU)P</i>  | In 5' LTR of <i>YPRCTy1-2</i> ; 173 bp upstream of <i>tN(GUU)P</i> , same orientation  |

---

C. Ty1*HIS3* integration events in wild-type strain

|       |   |        |                  |                                                            |
|-------|---|--------|------------------|------------------------------------------------------------|
| wt-23 | X | 374758 | <i>tR(UCU)J2</i> | 186 bp upstream of <i>tR(UCU)J2</i> , opposite orientation |
|-------|---|--------|------------------|------------------------------------------------------------|

|       |         |         |                         |                                                                                                                      |
|-------|---------|---------|-------------------------|----------------------------------------------------------------------------------------------------------------------|
| wt-27 | II      | 644957  | <i>tE(UUC)B</i>         | 205 bp upstream of <i>tE(UUC)B</i> , opposite orientation                                                            |
| wt-29 | XI      | 302481  | <i>tW(CCA)K</i>         | 81 bp upstream of <i>tW(CCA)K</i> , opposite orientation                                                             |
| wt-30 | Unknown | Unknown | Unknown                 | At +346 of Ty4 LTR, same orientation                                                                                 |
| wt-31 | Unknown | Unknown | Unknown                 | At +150 of Ty1 LTR, same orientation                                                                                 |
| wt-33 | VII     | 74252   | <i>tV(AAC)G3</i>        | 351 bp upstream of <i>tV(AAC)G3</i> , opposite orientation                                                           |
| wt-34 | XII     | 489250  | <i>RDN5-3, -5 or -6</i> | In <i>YLR156W</i> , <i>-159W</i> or <i>-161W</i> ; 100 bp upstream of <i>RDN5-3, -5 or -6</i> , opposite orientation |
| wt-36 | IV      | 803215  | <i>tQ(UUG)D3</i>        | In <i>YDRWdelta11</i> ; 416 bp upstream of <i>tQ(UUG)D3</i> , opposite orientation                                   |
| wt-37 | XI      | 74360   | <i>tN(GUU)K</i>         | In <i>YKLWdelta1</i> ; 269 bp upstream of <i>tN(GUU)K</i> , same orientation                                         |
| wt-38 | V       | 441821  | <i>SCR1</i>             | In <i>YER137C</i> , uncharacterized ORF; 162 bp upstream of <i>SCR1</i> , opposite orientation                       |
| wt-42 | Unknown | Unknown | Unknown                 | At +169 of Ty4 LTR, opposite orientation                                                                             |
| wt-44 | V       | 138480  | <i>tR(UCU)E</i>         | In <i>YELWdelta6</i> ; 186 bp upstream of <i>tR(UCU)E</i> , same orientation                                         |
| wt-46 | IV      | 1151138 | <i>tX(XXX)D</i>         | In <i>YDRWdelta25</i> ; in <i>YDR340W</i> , dubious ORF; 203 bp upstream of <i>tX(XXX)D</i> , same orientation       |
| wt-54 | II      | 750025  | —                       | At +436 in <i>CHK1</i> ORF, same orientation                                                                         |
| wt-56 | XIII    | 168360  | <i>SUP5</i>             | 435 bp upstream of <i>SUP5</i> , opposite orientation                                                                |

---
