# Supplementary material for: Rrm3 Protects the Saccharomyces cerevisiae Genome From Instability at Nascent Sites of Retrotransposition
Source: Oxford University Press journal article supplement (doi:10.1534/genetics.109.104208), 2009-05-05
Supplement: figures1.pdf [file figures1.pdf]

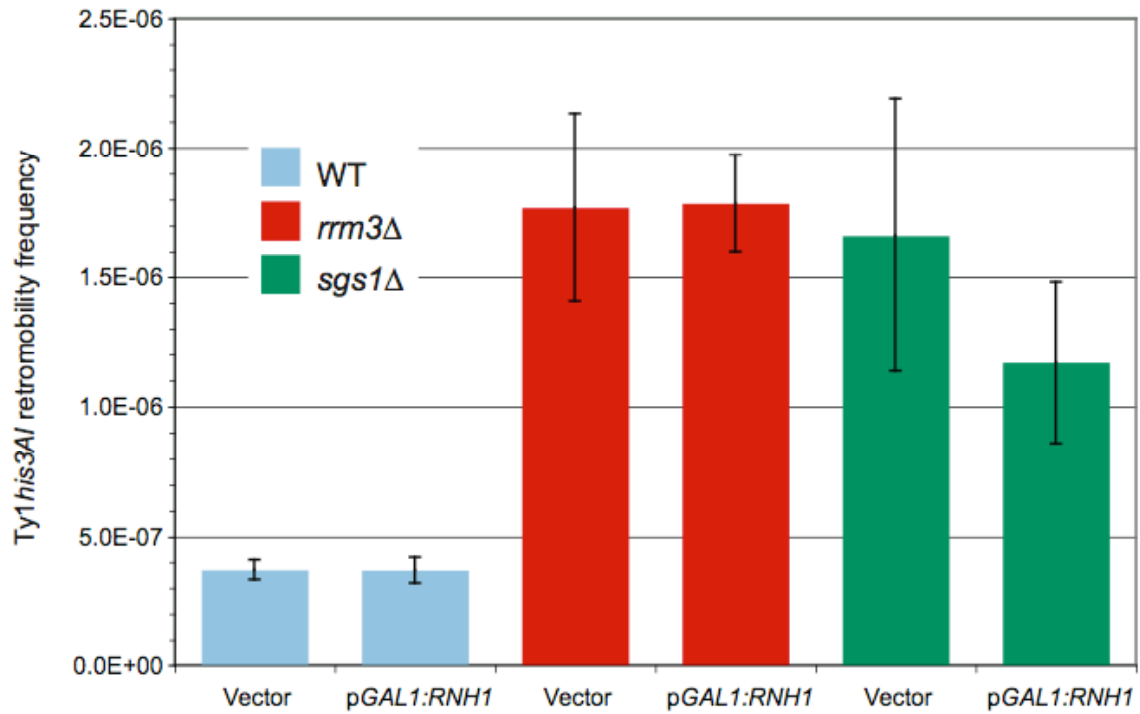

FIGURE S1.—Overexpression of RNase H does not effect the frequency of Ty1*his3AI* retromobility. Strains JC3212, JC3917 and JC4915 transformed with plasmid pRS416 or p*GAL1:RNH1* were grown overnight in SC-Ura glucose broth at 30°. Cells were pelleted and resuspended in an equal volume of H<sub>2</sub>O. Cells were diluted 1:100 into 4 ml SC-Ura galactose broth, divided into 4 cultures and grown to saturation at 20°. An equal volume of YPD broth was added to each culture, and the cultures were incubated for 18 to 20 hr at 20°. Aliquots of each culture were plated on SC-Ura and SC-Ura-His glucose agar. Plates were incubated for three days at 30° and the colonies were counted. The retromobility frequency is the average of the number of His<sup>+</sup> Ura<sup>+</sup> colonies divided by the total number of Ura<sup>+</sup> colonies that retained the vector or p*GAL1:RNH1* plasmid throughout incubation at 20°. The average of three experiments is presented. Error bars, standard error.
